# Supplementary material for: Activated TAZ induces liver cancer in collaboration with EGFR/HER2 signaling pathways
Source: PubMed Central journal article supplement (PMC9019950; doi:10.1186/s12885-022-09516-1), 2022-04-19
Supplement: 12885_2022_9516_MOESM1_ESM.pdf [file 12885_2022_9516_MOESM1_ESM.pdf]

# Supplementary Figure 1

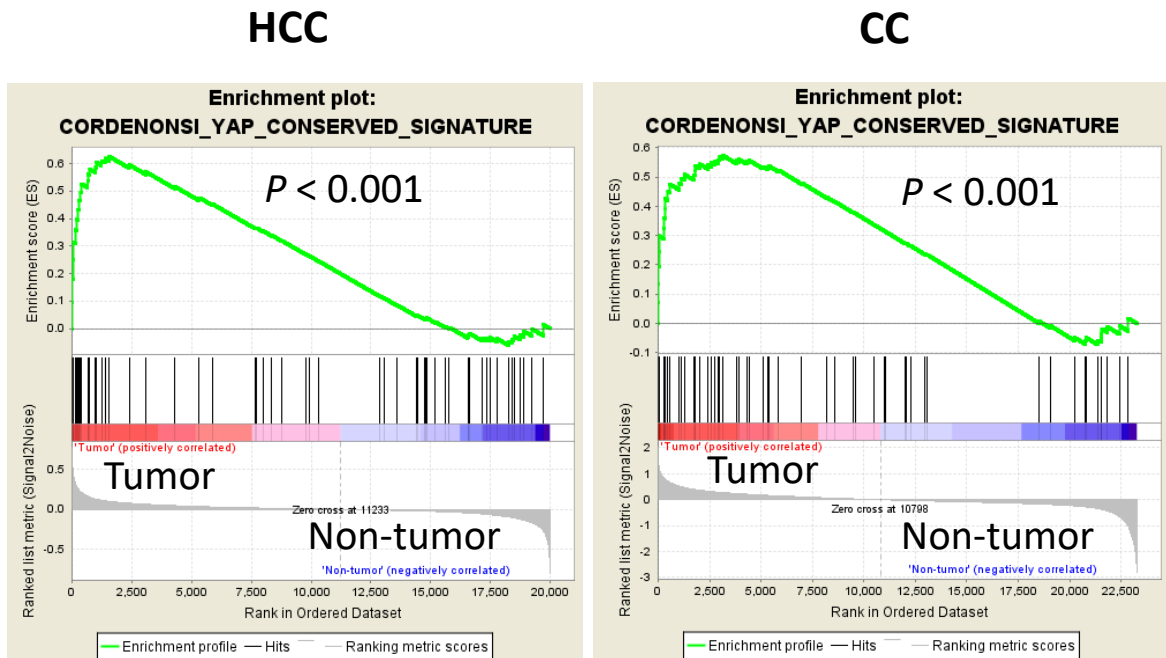

|                  | <u>Tumor vs Non-tumor</u>          |               |
|------------------|------------------------------------|---------------|
| <u>DataSet</u>   | GSE64041 (HCC)                     | GSE32958 (CC) |
| <u>GENESET</u>   | CORDENONSI_YAP_CONSERVED_SIGNATURE |               |
| <u>SIZE</u>      | 57                                 | 57            |
| <u>NES</u>       | 1.9171263                          | 1.9856614     |
| <u>NOM p-val</u> | 0                                  | 0             |
| <u>FDR q-val</u> | 0                                  | 0             |

NES, normalized enrichment score; FDR, false discovery rate.

**Supplementary Figure 1.** Enrichment plots from gene set enrichment analysis (GSEA). YAP/TAZ signals are highly enriched both in HCC and CC ( $P < 0.001$ ). Barcode indicates gene positions and the y-axis indicates the extent of enrichment.

# Supplementary Figure 2

TCGA\_HCC (n = 181)

TCGA\_CC (n = 30)

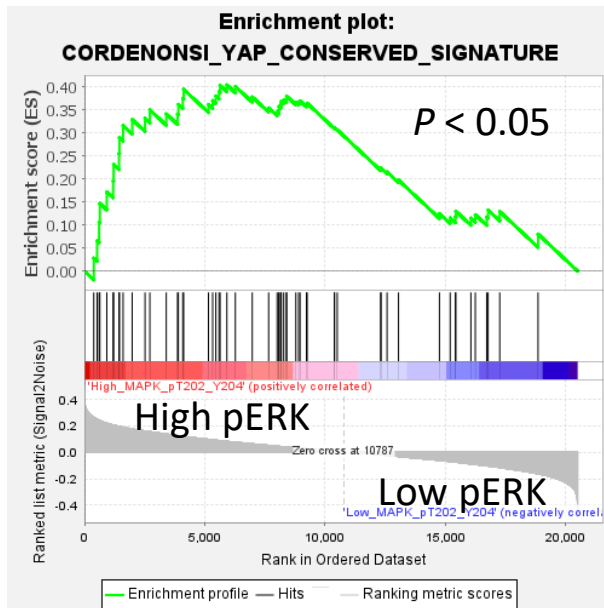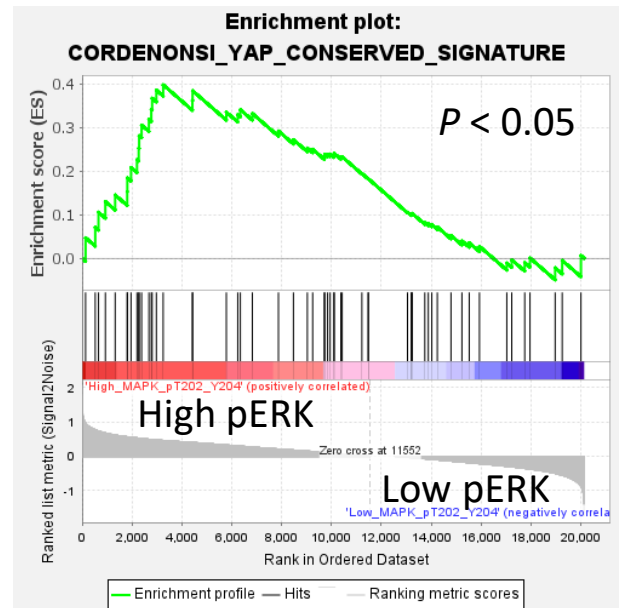

**Supplementary Figure 2.** Correlation between the YAP/TAZ signals and levels of phosphorylated ERK (pERK). GSEA was performed with regard to high and low levels of pERK using the TCGA database. Barcode indicates gene positions and the y-axis indicates the extent of enrichment.

# Supplementary Figure 3

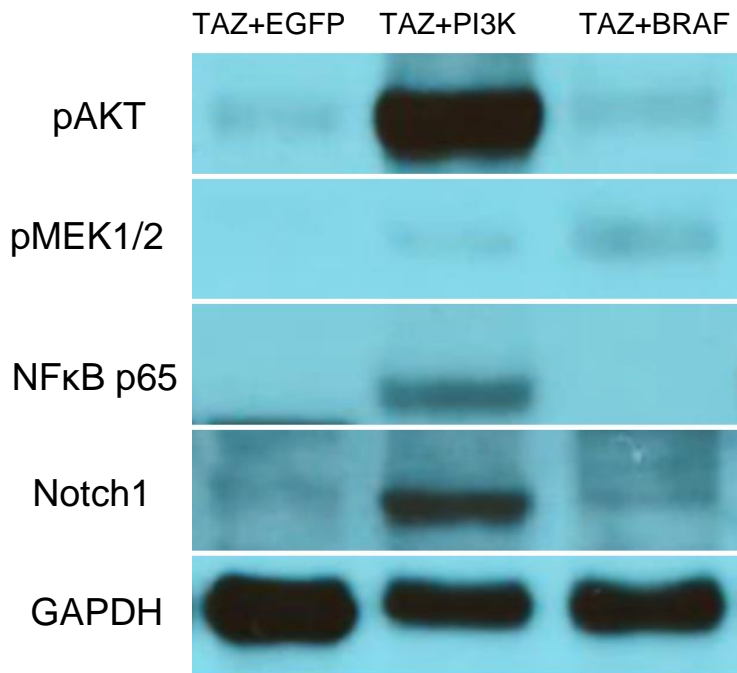

**Supplementary Figure 3.** Western blots showing expression levels of indicated genes in tumors from each group shown in Figure 5.
