# Supplementary material for: Activated TAZ induces liver cancer in collaboration with EGFR/HER2 signaling pathways
Source: PubMed Central journal article supplement (PMC9019950; doi:10.1186/s12885-022-09516-1), 2022-04-19

# The original western blot images for supplementary figure 3.

pAKT (cell signaling, #4060)

Phospho-MEK1/2 (Ser217/221) (cell signaling, #9154)

NFκB p65 (Santa Cruz, sc-372)

Activated Notch1 (Abcam, ab8925)

GAPDH (cell signaling, #2118)

- 1) EGFP
- 2) TAZ + EGFP
- 3) TAZ + PI3K
- 4) TAZ + Braf

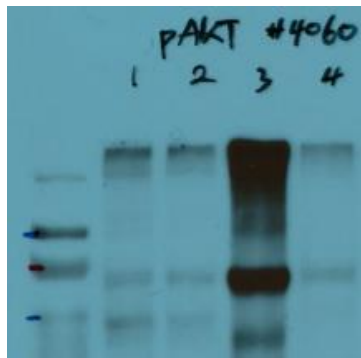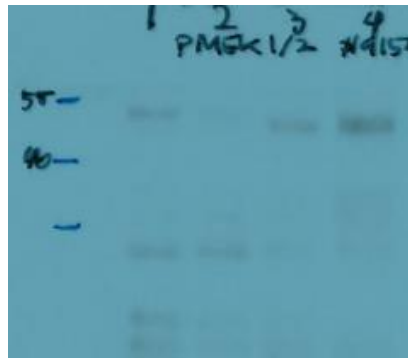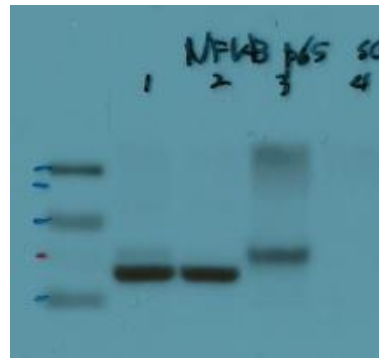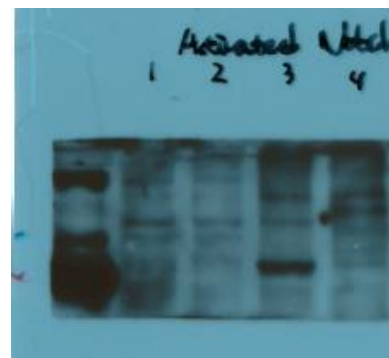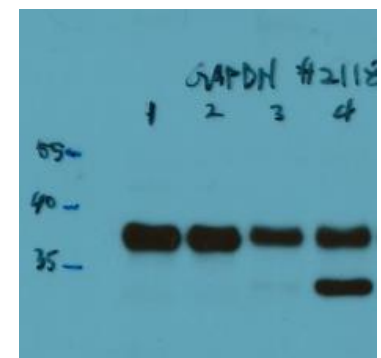

Supplement: 12885_2022_9516_MOESM3_ESM.pdf [file 12885_2022_9516_MOESM3_ESM.pdf]
